# Supplementary material
Source: PubMed Central journal article supplement (PMC9113487)
Supplement: table_s1_ioac015.pdf [file table_s1_ioac015.pdf]

## Supplementary Table 1

**Supplementary Table S1:** Antibody Information

| Antibody | Dilution | Source     | Catalogue number | Antigen Retrieval Method | Decidualization Marker Reference                                                                                                                                     |
|----------|----------|------------|------------------|--------------------------|----------------------------------------------------------------------------------------------------------------------------------------------------------------------|
| IRX3     | 1:100    | Invitrogen | PA5-35149        | EDTA                     | Herein                                                                                                                                                               |
| HAND2    | 1:50     | Abcam      | ab200040         | Citrate                  | Li Q et al (2011) <b>Science</b> 331: 912-916<br>Huyen DV, Bany BM (2011) <b>Reproduction</b> 142: 353-68<br>Yu HF et al (2018) <b>J Cell Physiol</b> 233: 1612-1626 |
| IGFBP4   | 1:100    | Invitrogen | PA5-76185        | Citrate                  | Henemyre C, Markoff E (1998) <b>Biol Reprod</b> 58: 801-6<br>Davila J et al (2015) <b>PLOS Genetics</b> 11:e1005458                                                  |
| CD31     | 1:200    | Abcam      | ab182981         | EDTA                     | Das A et al (2009) <b>Proc Natl Acad Sci</b> 106:12542-7<br>Lee SH et al (2017) <b>Reproduction</b> 154: 595-605                                                     |
| GJA1     | 1:250    | Abcam      | ab11370          | Citrate                  | Laws MJ et al <b>Development</b> 135: 2659-2668<br>Das A et al (2009) <b>Proc Natl Acad Sci</b> 106:12542-7                                                          |
